# Supplementary material
Source: publisher figshare collection journal article supplement (https://diabetesjournals.figshare.com/articles/dataset/_/12896426)
Supplement: Supplementary file 1 [file 1]

# **Supplementary material**

## **The updated German Diabetes Risk Score**

The updated German Diabetes Risk Score (GDRS) is a risk score that was trained in 21845 participants of the prospective EPIC-Potsdam study with a mean follow-up time of 7 years (1). It was validated in 3625 participants of the German National Health Interview and Examination Survey 1998 (baseline) with follow up data in the German Health Interview and Examination Survey for Adults (follow-up) (2).

The score is based on clinical phenotypes and aims to identify those at risk of developing type 2 diabetes in the German population. It is built by assigning weights to each variable, which are derived from the regression model used to develop the score (1; 2).

## **Physical activity definition in both cohorts**

In KORA, physical activity was assessed using a questionnaire with about weekly exercise frequency and duration in summer and winter (3). Potential answers were (1) > 2 hours, (2) 1–2 hours, (3) <1 hour and (4) none. Participants with a total score < 5, obtained by summing the numbers (1)–(4) relating to winter and summer, we considered to be ‘physically active’. Those who walked at least 30 minutes a day were also considered ‘physically active’. In HUNT, we applied the same definition to maintain consistency.

## **Validation of the SOMAscan protein measurements**

We checked the performance of the SOMAscan platform in KORA by examining the correlation between SOMAscan measured biomarkers and their overlapping counterparts measured using other techniques.

These proteins were leptin measured in plasma by ELISA from Mercodia (Stockholm, Sweden), C-reactive protein (CRP), cystatin-C measured in plasma by a high-sensitivity latex-enhanced nephelometric assay on a BN II analyzer from Dade Behring (Erlangen, Germany) and 7 proteins measured by selected reaction monitoring mass spectrometry (SRM-MS).

We used Pearson correlation to test the concordance between proteins measured with SOMAscan and other techniques in KORA (Supplementary Figure S10, S11). CRP, leptin and cystatin-C showed good correlation, with their  $r$  ranging between 0.94 for CRP and 0.75 for cystatin-C. Proteins measured by SRM-MS showed good correlation for CRP, Mannose-binding protein C (MBL2), Thrombospondin-1 (THBS1), SHBG and adiponectin (ADIPOQ) with  $r$  ranging from 0.69 to 0.85 while RBP4 and CD5L showed lower  $r$  of 0.31 and 0.55 respectively.

Furthermore, we checked the validity of the replicated proteins by examining the data from Emilsson V. et al, where the authors validated the SOMAscan measurements using mass spectrometry (4). We found information on the validation for 22 of the unique 26 replicated proteins (Supplementary Table S10).

### **STRING protein-protein interaction network analysis**

We queried STRING (5), the protein-protein interaction server, to visually assess the relationship between these candidate proteins and other proteins connected to type 2 diabetes. We used our replicated proteins and the type 2 diabetes associated proteins curated from UniProt as seed proteins and specified that no additional proteins (interactors) should be added by STRING to the network.

Among the type 2 diabetes associated proteins in UniProt (6) (Supplementary table S5; Protein origin: UniProtKB), 19 out of 23 proteins form a complex network with 17 of our 26 replicated proteins in STRING (Supplementary Figure S12).

Table S1: Baseline characteristics of the incident cohorts with those with type 2 diabetes at baseline excluded.

| Variable                     | KORA (n=881)    | HUNT (n=794)        | p value* |
|------------------------------|-----------------|---------------------|----------|
| Age † (years)                | 58.63 (43 - 75) | 68.83 (31.6 - 99.4) | <0.001   |
| Sex female ‡                 | 464 (52.7 %)    | 199 (25.1 %)        | <0.001   |
| BMI § (kg/m2)                | 27.41 (4.41)    | 28.04 (3.69)        | 0.002    |
| Waist circumference § (cm)   | 93.31 (13.55)   | 98.94 (10.49)       | <0.001   |
| Physical inactivity ‡        | 560 (63.6 %)    | 407 (52.2 %)        | <0.001   |
| Smoking ‡                    |                 |                     | <0.001   |
| Never smoker                 | 382 (43.4 %)    | 192 (24.2 %)        |          |
| Former smoker                | 367 (41.7 %)    | 430 (54.2 %)        |          |
| Current smoker               | 132 (15.0 %)    | 172 (21.7 %)        |          |
| Family history of diabetes ‡ | 255 (34.8 %)    | 201 (26.8 %)        | 0.001    |
| Hypertension ‡               | 316 (35.9 %)    | 304 (38.3 %)        | 0.331    |

\* Continuous variables were tested for a difference between the two populations using t-tests and categorical variables with Chi-square tests with continuity correction.

† Mean (range); ‡ number (percentage); § mean ± standard deviation.

Table S2: KORA FDR significant results of prevalent type 2 diabetes in KORA, HUNT as well as their combined effect using a meta-analysis random effects model. Model was adjusted for age and sex, body mass index (BMI), smoking and hypertension.

| Protein Full Name                                  | UniProt ID | KORA (n = 993)     |          | HUNT (n = 940)     |          | Combined           |          |
|----------------------------------------------------|------------|--------------------|----------|--------------------|----------|--------------------|----------|
|                                                    |            | OR (95% CI)        | p value  | OR (95% CI)        | p value  | OR (95% CI)        | p value  |
| 72 kDa type IV collagenase                         | P08253     | 0.7 (0.56 - 0.87)  | 1.83E-03 | 0.89 (0.73 - 1.08) | 2.36E-01 | 0.79 (0.63 - 1.01) | 5.63E-02 |
| Adiponectin                                        | Q15848     | 0.57 (0.44 - 0.75) | 3.96E-05 |                    |          |                    |          |
| Afamin                                             | P43652     | 1.52 (1.22 - 1.92) | 2.97E-04 | 1.11 (0.91 - 1.36) | 3.20E-01 | 1.29 (0.95 - 1.77) | 1.05E-01 |
| Alpha-1-antichymotrypsin                           | P01011     | 0.71 (0.56 - 0.89) | 3.07E-03 | 0.93 (0.77 - 1.11) | 4.14E-01 | 0.82 (0.63 - 1.06) | 1.35E-01 |
| Alpha-1-antichymotrypsin complex                   | P01011     | 0.7 (0.56 - 0.88)  | 2.25E-03 | 1.09 (0.9 - 1.31)  | 3.49E-01 | 0.88 (0.57 - 1.36) | 5.66E-01 |
| Alpha-L-iduronidase                                | P35475     | 1.48 (1.2 - 1.84)  | 3.04E-04 | 1.44 (1.19 - 1.74) | 1.59E-04 | 1.46 (1.26 - 1.68) | 1.78E-07 |
| Aminoacylase-1                                     | Q03154     | 2.1 (1.64 - 2.71)  | 5.62E-09 | 1.49 (1.22 - 1.84) | 1.26E-04 | 1.76 (1.26 - 2.46) | 9.23E-04 |
| Apolipoprotein B                                   | P04114     | 0.48 (0.37 - 0.61) | 4.19E-09 | 0.7 (0.57 - 0.84)  | 2.87E-04 | 0.58 (0.4 - 0.84)  | 3.63E-03 |
| Arylsulfatase A                                    | P15289     | 1.31 (1.09 - 1.57) | 3.62E-03 | 1.13 (0.96 - 1.33) | 1.37E-01 | 1.21 (1.05 - 1.39) | 7.88E-03 |
| Calpastatin                                        | P20810     | 0.62 (0.46 - 0.82) | 1.00E-03 | 0.86 (0.7 - 1.05)  | 1.44E-01 | 0.74 (0.54 - 1.03) | 7.13E-02 |
| Cathepsin D                                        | P07339     | 1.39 (1.14 - 1.7)  | 1.13E-03 | 1.22 (1.01 - 1.48) | 4.02E-02 | 1.3 (1.13 - 1.49)  | 1.90E-04 |
| Cathepsin Z                                        | Q9UBR2     | 1.41 (1.13 - 1.77) | 2.27E-03 | 1.33 (1.1 - 1.62)  | 3.20E-03 | 1.37 (1.18 - 1.58) | 2.39E-05 |
| C-C motif chemokine 23                             | P55773     | 0.7 (0.56 - 0.88)  | 2.92E-03 | 0.81 (0.66 - 0.99) | 3.99E-02 | 0.76 (0.65 - 0.89) | 4.44E-04 |
| CD97 antigen                                       | P48960     | 0.66 (0.51 - 0.84) | 1.14E-03 | 0.84 (0.68 - 1.02) | 8.69E-02 | 0.75 (0.59 - 0.96) | 2.03E-02 |
| Cerebral dopamine neurotrophic factor              | Q49AH0     | 0.64 (0.48 - 0.82) | 7.25E-04 | 0.7 (0.55 - 0.87)  | 1.83E-03 | 0.67 (0.56 - 0.79) | 4.89E-06 |
| Chordin-like protein 1                             | Q9BU40     | 0.57 (0.43 - 0.74) | 2.51E-05 | 0.79 (0.63 - 0.98) | 2.94E-02 | 0.67 (0.49 - 0.93) | 1.47E-02 |
| Ciliary neurotrophic factor receptor subunit alpha | P26992     | 0.71 (0.57 - 0.89) | 2.30E-03 | 0.81 (0.67 - 0.98) | 3.16E-02 | 0.77 (0.66 - 0.88) | 2.84E-04 |
| Ck-beta-8-1                                        | P55773     | 0.66 (0.53 - 0.82) | 2.18E-04 | 0.79 (0.65 - 0.96) | 1.58E-02 | 0.73 (0.61 - 0.86) | 2.47E-04 |
| Coagulation factor IX                              | P00740     | 1.67 (1.3 - 2.18)  | 1.10E-04 | 1.14 (0.94 - 1.41) | 2.02E-01 | 1.37 (0.94 - 1.98) | 9.88E-02 |
| Coagulation factor IXab                            | P00740     | 1.69 (1.31 - 2.22) | 9.18E-05 | 1.12 (0.93 - 1.37) | 2.63E-01 | 1.36 (0.91 - 2.04) | 1.34E-01 |
| Coiled-coil domain-containing protein 80           | Q76M96     | 0.62 (0.48 - 0.79) | 1.05E-04 | 0.85 (0.68 - 1.07) | 1.78E-01 | 0.73 (0.53 - 1)    | 5.15E-02 |
| Collagenase 3                                      | P45452     | 0.53 (0.36 - 0.76) | 1.06E-03 | 0.96 (0.77 - 1.16) | 6.89E-01 | 0.73 (0.41 - 1.3)  | 2.86E-01 |
| Complement C2                                      | P06681     | 2.01 (1.37 - 3.04) | 6.63E-04 | 1.47 (1.2 - 1.82)  | 3.03E-04 | 1.63 (1.22 - 2.19) | 9.06E-04 |
| Complement C3b, inactivated                        | P01024     | 1.42 (1.15 - 1.77) | 1.34E-03 |                    |          |                    |          |
| Complement component C9                            | P02748     | 0.72 (0.58 - 0.88) | 1.71E-03 | 1.06 (0.87 - 1.3)  | 5.73E-01 | 0.87 (0.59 - 1.28) | 4.84E-01 |
| Cystatin-M                                         | Q15828     | 0.68 (0.54 - 0.85) | 8.95E-04 | 0.84 (0.69 - 1.02) | 8.11E-02 | 0.76 (0.62 - 0.94) | 1.01E-02 |
| Dickkopf-like protein 1                            | Q9UK85     | 1.35 (1.14 - 1.66) | 1.26E-03 | 1.08 (0.89 - 1.3)  | 4.33E-01 | 1.21 (0.97 - 1.51) | 9.82E-02 |
| Dickkopf-related protein 3                         | Q9UBP4     | 0.69 (0.54 - 0.87) | 1.95E-03 | 0.86 (0.7 - 1.06)  | 1.70E-01 | 0.78 (0.62 - 0.97) | 2.64E-02 |
| Ectodysplasin-A, secreted form                     | Q92838     | 0.64 (0.49 - 0.83) | 1.18E-03 | 0.85 (0.68 - 1.04) | 1.30E-01 | 0.75 (0.57 - 0.98) | 3.56E-02 |
| Endoplasmic reticulum resident protein 29          | P30040     | 1.44 (1.15 - 1.82) | 1.97E-03 | 1.21 (1 - 1.45)    | 4.81E-02 | 1.3 (1.1 - 1.54)   | 2.64E-03 |

|                                              |        |                    |          |                    |          |                    |          |
|----------------------------------------------|--------|--------------------|----------|--------------------|----------|--------------------|----------|
| Endostatin                                   | P39060 | 0.7 (0.57 - 0.86)  | 6.07E-04 | 1.04 (0.85 - 1.27) | 7.21E-01 | 0.85 (0.58 - 1.26) | 4.17E-01 |
| Endothelial cell-specific molecule 1         | Q9NQ30 | 0.62 (0.47 - 0.8)  | 4.30E-04 | 0.8 (0.62 - 1)     | 6.68E-02 | 0.71 (0.55 - 0.91) | 6.96E-03 |
| Endothelin-converting enzyme 1               | P42892 | 0.71 (0.57 - 0.88) | 1.66E-03 | 0.84 (0.7 - 1)     | 5.24E-02 | 0.78 (0.66 - 0.92) | 3.17E-03 |
| Ephrin type-B receptor 2                     | P29323 | 0.68 (0.55 - 0.84) | 4.68E-04 | 0.97 (0.79 - 1.18) | 7.41E-01 | 0.81 (0.57 - 1.15) | 2.40E-01 |
| Ephrin type-B receptor 6                     | O15197 | 0.7 (0.55 - 0.88)  | 2.26E-03 | 0.96 (0.78 - 1.16) | 6.86E-01 | 0.82 (0.6 - 1.13)  | 2.25E-01 |
| Fibroblast growth factor 19                  | O95750 | 0.6 (0.47 - 0.75)  | 1.19E-05 | 0.87 (0.72 - 1.04) | 1.35E-01 | 0.73 (0.5 - 1.05)  | 8.71E-02 |
| Fibronectin Fragment 4                       | P02751 | 0.7 (0.56 - 0.87)  | 1.27E-03 | 0.82 (0.68 - 0.99) | 3.65E-02 | 0.76 (0.65 - 0.89) | 7.03E-04 |
| Ficolin-3                                    | O75636 | 1.46 (1.15 - 1.87) | 2.46E-03 | 1.15 (0.94 - 1.42) | 1.70E-01 | 1.28 (1.02 - 1.62) | 3.18E-02 |
| Galectin-3-binding protein                   | Q08380 | 1.6 (1.27 - 2.01)  | 5.04E-05 | 1.43 (1.2 - 1.72)  | 9.47E-05 | 1.5 (1.3 - 1.72)   | 2.40E-08 |
| Galectin-4                                   | P56470 | 1.33 (1.1 - 1.59)  | 2.29E-03 | 1.18 (1.01 - 1.39) | 3.36E-02 | 1.24 (1.1 - 1.39)  | 3.39E-04 |
| GDNF family receptor alpha-2                 | O00451 | 0.63 (0.5 - 0.78)  | 5.02E-05 | 0.83 (0.69 - 1.01) | 5.86E-02 | 0.73 (0.55 - 0.96) | 2.45E-02 |
| Gelsolin                                     | P06396 | 0.55 (0.43 - 0.69) | 4.31E-07 | 0.66 (0.54 - 0.81) | 4.31E-05 | 0.61 (0.51 - 0.73) | 1.06E-07 |
| Hepatocyte growth factor receptor            | P08581 | 0.62 (0.49 - 0.78) | 4.89E-05 | 0.78 (0.65 - 0.92) | 4.93E-03 | 0.7 (0.57 - 0.88)  | 1.58E-03 |
| Iduronate 2-sulfatase                        | P22304 | 0.69 (0.54 - 0.87) | 1.77E-03 | 0.85 (0.71 - 1.02) | 7.03E-02 | 0.77 (0.63 - 0.95) | 1.35E-02 |
| Insulin-like growth factor-binding protein 2 | P18065 | 0.42 (0.32 - 0.55) | 1.53E-09 | 0.76 (0.59 - 0.97) | 2.57E-02 | 0.57 (0.32 - 1)    | 5.19E-02 |
| Interleukin-11 receptor subunit alpha        | Q14626 | 0.58 (0.44 - 0.75) | 3.23E-05 | 0.82 (0.67 - 1)    | 5.49E-02 | 0.7 (0.49 - 0.98)  | 3.98E-02 |
| Interleukin-22 receptor subunit alpha-2      | Q969J5 | 0.72 (0.57 - 0.9)  | 3.42E-03 | 0.93 (0.78 - 1.11) | 4.07E-01 | 0.82 (0.64 - 1.06) | 1.26E-01 |
| Kallikrein-7                                 | P49862 | 0.59 (0.46 - 0.75) | 1.47E-05 | 0.67 (0.54 - 0.82) | 1.95E-04 | 0.63 (0.54 - 0.74) | 1.49E-08 |
| Kynureninase                                 | Q16719 | 1.35 (1.1 - 1.65)  | 3.44E-03 | 1.11 (0.92 - 1.33) | 2.66E-01 | 1.22 (1 - 1.48)    | 4.53E-02 |
| Legumain                                     | Q99538 | 1.41 (1.18 - 1.74) | 3.80E-04 | 1.17 (0.97 - 1.4)  | 8.96E-02 | 1.28 (1.07 - 1.54) | 7.56E-03 |
| Leucine carboxyl methyltransferase 1         | Q9UIC8 | 0.48 (0.32 - 0.72) | 4.68E-04 | 0.87 (0.69 - 1.07) | 1.90E-01 | 0.66 (0.37 - 1.18) | 1.59E-01 |
| Lysosomal protective protein                 | P10619 | 1.54 (1.24 - 1.92) | 8.51E-05 | 1.32 (1.09 - 1.6)  | 5.48E-03 | 1.42 (1.21 - 1.65) | 1.05E-05 |
| Matrilin-2                                   | O00339 | 0.62 (0.49 - 0.77) | 2.77E-05 | 0.7 (0.57 - 0.86)  | 7.17E-04 | 0.66 (0.57 - 0.77) | 1.05E-07 |
| Melanoma-derived growth regulatory protein   | Q16674 | 0.69 (0.55 - 0.87) | 2.09E-03 | 0.79 (0.65 - 0.96) | 1.75E-02 | 0.75 (0.65 - 0.87) | 1.47E-04 |
| Muellerian-inhibiting factor                 | P03971 | 0.72 (0.57 - 0.9)  | 3.85E-03 | 1.02 (0.84 - 1.21) | 8.70E-01 | 0.86 (0.61 - 1.21) | 3.81E-01 |
| Myoglobin                                    | P02144 | 0.68 (0.53 - 0.86) | 1.51E-03 | 0.81 (0.66 - 0.99) | 4.18E-02 | 0.75 (0.63 - 0.89) | 1.16E-03 |
| NADPH--cytochrome P450 reductase             | P16435 | 1.43 (1.14 - 1.78) | 1.52E-03 | 1.08 (0.9 - 1.31)  | 4.00E-01 | 1.24 (0.94 - 1.62) | 1.23E-01 |
| Netrin receptor UNC5D                        | Q6UXZ4 | 0.55 (0.43 - 0.71) | 3.04E-06 | 0.82 (0.69 - 0.97) | 2.28E-02 | 0.68 (0.46 - 1)    | 4.98E-02 |
| Neurexin-1-beta                              | P58400 | 0.59 (0.42 - 0.81) | 1.97E-03 | 0.79 (0.62 - 0.98) | 4.66E-02 | 0.7 (0.53 - 0.92)  | 1.21E-02 |
| Neurogenic locus notch homolog protein 1     | P46531 | 0.7 (0.56 - 0.88)  | 1.99E-03 | 0.83 (0.69 - 1)    | 5.41E-02 | 0.77 (0.66 - 0.91) | 1.93E-03 |
| Osteomodulin                                 | Q99983 | 0.61 (0.47 - 0.77) | 3.89E-05 | 0.64 (0.52 - 0.78) | 1.22E-05 | 0.62 (0.54 - 0.73) | 2.03E-09 |
| Pappalysin-1                                 | Q13219 | 0.71 (0.57 - 0.88) | 1.88E-03 | 1.06 (0.87 - 1.28) | 5.87E-01 | 0.87 (0.59 - 1.28) | 4.77E-01 |

|                                                                        |        |                    |          |                    |          |                    |          |
|------------------------------------------------------------------------|--------|--------------------|----------|--------------------|----------|--------------------|----------|
| Peptide YY                                                             | P10082 | 1.34 (1.1 - 1.62)  | 3.36E-03 | 1.53 (1.27 - 1.86) | 9.26E-06 | 1.43 (1.25 - 1.64) | 1.77E-07 |
| Periostin                                                              | Q15063 | 0.54 (0.43 - 0.68) | 1.52E-07 | 0.75 (0.62 - 0.92) | 5.50E-03 | 0.64 (0.47 - 0.88) | 6.59E-03 |
| Peroxiredoxin-1                                                        | Q06830 | 1.41 (1.15 - 1.72) | 9.65E-04 | 1.01 (0.83 - 1.21) | 9.51E-01 | 1.19 (0.85 - 1.65) | 3.09E-01 |
| Plasma protease C1 inhibitor                                           | P05155 | 0.67 (0.53 - 0.84) | 5.39E-04 | 0.76 (0.61 - 0.93) | 9.66E-03 | 0.72 (0.61 - 0.83) | 2.10E-05 |
| Plasminogen activator inhibitor 1                                      | P05121 | 1.46 (1.16 - 1.83) | 1.19E-03 | 1.17 (0.97 - 1.42) | 1.03E-01 | 1.29 (1.05 - 1.6)  | 1.71E-02 |
| Protein S100-A9                                                        | P06702 | 1.53 (1.24 - 1.88) | 6.16E-05 |                    |          |                    |          |
| Proto-oncogene tyrosine-protein kinase receptor Ret                    | P07949 | 1.39 (1.13 - 1.7)  | 1.75E-03 | 1.26 (1.02 - 1.56) | 3.04E-02 | 1.33 (1.14 - 1.54) | 1.73E-04 |
| Pulmonary surfactant-associated protein D                              | P35247 | 1.43 (1.16 - 1.77) | 6.82E-04 | 0.94 (0.77 - 1.12) | 4.96E-01 | 1.16 (0.76 - 1.75) | 4.96E-01 |
| Renin                                                                  | P00797 | 1.61 (1.32 - 1.99) | 5.48E-06 | 1.45 (1.21 - 1.74) | 5.16E-05 | 1.52 (1.33 - 1.74) | 1.54E-09 |
| Retinol-binding protein 4                                              | P02753 | 1.3 (1.08 - 1.55)  | 3.68E-03 |                    |          |                    |          |
| RGM domain family member B                                             | Q6NW40 | 0.64 (0.49 - 0.81) | 3.52E-04 | 0.73 (0.59 - 0.9)  | 3.25E-03 | 0.69 (0.59 - 0.81) | 5.33E-06 |
| Sex hormone-binding globulin                                           | P04278 | 0.62 (0.47 - 0.8)  | 2.41E-04 | 0.63 (0.51 - 0.77) | 1.12E-05 | 0.62 (0.53 - 0.73) | 1.04E-08 |
| SLIT and NTRK-like protein 5                                           | O94991 | 0.6 (0.47 - 0.76)  | 3.81E-05 | 0.78 (0.66 - 0.93) | 4.38E-03 | 0.7 (0.54 - 0.9)   | 5.11E-03 |
| SPARC-like protein 1                                                   | Q14515 | 0.69 (0.55 - 0.86) | 1.22E-03 | 0.99 (0.82 - 1.21) | 9.37E-01 | 0.83 (0.58 - 1.19) | 3.10E-01 |
| Transforming growth factor beta receptor type 3                        | Q03167 | 0.58 (0.46 - 0.73) | 4.45E-06 | 0.74 (0.61 - 0.89) | 1.40E-03 | 0.66 (0.52 - 0.85) | 9.40E-04 |
| Trypsin-1                                                              | P07477 | 0.63 (0.5 - 0.78)  | 4.06E-05 | 0.7 (0.58 - 0.84)  | 2.19E-04 | 0.67 (0.58 - 0.77) | 4.35E-08 |
| Tumor necrosis factor receptor superfamily member 11B                  | O00300 | 0.7 (0.58 - 0.86)  | 5.86E-04 |                    |          |                    |          |
| Tumor necrosis factor receptor superfamily member 13C                  | Q96RJ3 | 1.33 (1.12 - 1.57) | 7.26E-04 | 0.88 (0.69 - 1.07) | 2.43E-01 | 1.09 (0.72 - 1.63) | 6.90E-01 |
| Tumor necrosis factor-inducible gene 6 protein                         | P98066 | 0.58 (0.45 - 0.74) | 2.27E-05 | 0.7 (0.57 - 0.85)  | 3.96E-04 | 0.65 (0.54 - 0.77) | 1.28E-06 |
| Tyrosine-protein kinase JAK2                                           | O60674 | 0.72 (0.58 - 0.89) | 2.54E-03 | 0.9 (0.76 - 1.07)  | 1.71E-01 | 0.81 (0.66 - 1.01) | 5.64E-02 |
| Tyrosine-protein kinase transmembrane receptor ROR1                    | Q01973 | 0.65 (0.49 - 0.84) | 1.26E-03 | 0.95 (0.77 - 1.15) | 6.12E-01 | 0.79 (0.54 - 1.15) | 2.23E-01 |
| WAP, Kazal, immunoglobulin, Kunitz and NTR domain-containing protein 2 | Q8TEU8 | 0.69 (0.54 - 0.87) | 2.10E-03 | 0.85 (0.7 - 1.04)  | 1.13E-01 | 0.77 (0.63 - 0.95) | 1.31E-02 |
| Wnt inhibitory factor 1                                                | Q9Y5W5 | 0.5 (0.37 - 0.66)  | 2.97E-06 | 0.65 (0.54 - 0.79) | 2.21E-05 | 0.58 (0.45 - 0.76) | 6.44E-05 |

Table S3: KORA FDR significant results of Incident type 2 diabetes in KORA, HUNT as well as their combined effect using a meta-analysis random effects model. Model was adjusted for age and sex, body mass index (BMI), smoking and current hypertension status.

| Protein Full Name                                    | UniProt ID | KORA (N = 881)     |          | HUNT (N = 794)     |          | Combined           |          |
|------------------------------------------------------|------------|--------------------|----------|--------------------|----------|--------------------|----------|
|                                                      |            | OR (95% CI)        | p value  | OR (95% CI)        | p value  | OR (95% CI)        | Pvalue   |
| Adiponectin                                          | Q15848     | 0.41 (0.29 - 0.57) | 1.84E-07 |                    |          |                    |          |
| Afamin                                               | P43652     | 2.18 (1.64 - 2.94) | 1.31E-07 | 1.09 (0.86 - 1.4)  | 4.90E-01 | 1.53 (0.78 - 3.03) | 2.18E-01 |
| Aminoacylase-1                                       | Q03154     | 1.78 (1.34 - 2.37) | 7.15E-05 | 1.6 (1.26 - 2.04)  | 1.27E-04 | 1.67 (1.39 - 2.01) | 3.97E-08 |
| Growth hormone receptor                              | P10912     | 1.74 (1.31 - 2.38) | 2.43E-04 | 1.42 (1.07 - 1.88) | 1.37E-02 | 1.56 (1.28 - 1.91) | 1.64E-05 |
| Insulin-like growth factor-binding protein 2         | P18065     | 0.47 (0.34 - 0.65) | 6.07E-06 | 0.57 (0.42 - 0.77) | 2.91E-04 | 0.52 (0.42 - 0.65) | 1.01E-08 |
| Netrin receptor UNC5D                                | Q6UXZ4     | 0.57 (0.41 - 0.78) | 4.37E-04 | 0.89 (0.71 - 1.12) | 2.88E-01 | 0.72 (0.46 - 1.11) | 1.39E-01 |
| Pappalysin-1                                         | Q13219     | 0.59 (0.45 - 0.77) | 1.02E-04 | 1.02 (0.8 - 1.3)   | 8.45E-01 | 0.78 (0.45 - 1.34) | 3.67E-01 |
| Scavenger receptor cysteine-rich type 1 protein M130 | Q86VB7     | 1.56 (1.23 - 2.01) | 3.68E-04 | 0.98 (0.79 - 1.22) | 8.53E-01 | 1.23 (0.78 - 1.95) | 3.70E-01 |
| Tartrate-resistant acid phosphatase type 5           | P13686     | 1.74 (1.31 - 2.34) | 1.97E-04 | 1.13 (0.9 - 1.44)  | 3.14E-01 | 1.39 (0.91 - 2.12) | 1.27E-01 |
| Transforming growth factor beta receptor type 3      | Q03167     | 0.58 (0.44 - 0.77) | 1.38E-04 | 0.83 (0.68 - 1.02) | 5.55E-02 | 0.7 (0.5 - 0.99)   | 4.35E-02 |



Table S4: Overlap between our replicated proteins with type 2 diabetes associated genes from Xue et al, and Human Diabetes Proteome Project (HDPP) lists: 1000 diabetes related proteins list, islet of Langerhans proteome, rodent beta cell proteome and blood glycated proteins database.

| Full Name                                    | UniProt ID | Entrez Gene | Outcome in our study | T2D genes | HDPP lists        |                |                           |                   | Any |
|----------------------------------------------|------------|-------------|----------------------|-----------|-------------------|----------------|---------------------------|-------------------|-----|
|                                              |            |             |                      |           | T2D 1000 proteins | Islet proteome | Rodent beta cell proteome | Glycated proteins |     |
| Aminoacylase-1                               | Q03154     | ACY1        | Both                 |           |                   | Y              |                           |                   | Y   |
| Growth hormone receptor                      | P10912     | GHR         | Incident             |           | Y                 |                |                           |                   | Y   |
| Insulin-like growth factor-binding protein 2 | P18065     | IGFBP2      | Incident             |           | Y                 | Y              |                           |                   | Y   |
| Alpha-L-iduronidase                          | P35475     | IDUA        | Prevalent            |           |                   | Y              |                           |                   | Y   |
| Apolipoprotein B                             | P04114     | APOB        | Prevalent            |           | Y                 | Y              |                           |                   | Y   |
| Cathepsin Z                                  | Q9UBR2     | CTSZ        | Prevalent            |           |                   | Y              |                           |                   | Y   |
| Cerebral dopamine neurotrophic factor        | Q49AH0     | CDNF        | Prevalent            |           |                   |                |                           |                   |     |
| Complement C2                                | P06681     | C2          | Prevalent            | Y         |                   |                |                           |                   | Y   |
| Galectin-3-binding protein                   | Q08380     | LGALS3BP    | Prevalent            |           |                   | Y              |                           |                   | Y   |
| Gelsolin                                     | P06396     | GSN         | Prevalent            |           |                   | Y              |                           |                   | Y   |
| Hepatocyte growth factor receptor            | P08581     | MET         | Prevalent            |           |                   | Y              |                           |                   | Y   |
| Kallikrein-7                                 | P49862     | KLK7        | Prevalent            |           |                   |                |                           |                   |     |
| Lysosomal protective protein                 | P10619     | CTSA        | Prevalent            |           |                   | Y              |                           |                   | Y   |
| Matrilin-2                                   | O00339     | MATN2       | Prevalent            |           |                   |                |                           |                   |     |
| Osteomodulin                                 | Q99983     | OMD         | Prevalent            |           |                   |                |                           |                   |     |
| Peptide YY                                   | P10082     | PYY         | Prevalent            |           | Y                 |                |                           |                   | Y   |
| Periostin                                    | Q15063     | POSTN       | Prevalent            |           |                   | Y              |                           |                   | Y   |
| Plasma protease C1 inhibitor                 | P05155     | SERPING1    | Prevalent            |           |                   | Y              |                           |                   | Y   |
| Renin                                        | P00797     | REN         | Prevalent            |           | Y                 |                |                           |                   | Y   |
| RGM domain family member B                   | Q6NW40     | RGMB        | Prevalent            |           |                   |                |                           |                   |     |
| Sex hormone-binding globulin                 | P04278     | SHBG        | Prevalent            |           | Y                 |                |                           |                   | Y   |
| SLIT and NTRK-like protein 5                 | O94991     | SLITRK5     | Prevalent            |           |                   |                |                           |                   |     |

|                                                 |        |         |           |  |   |   |  |  |   |
|-------------------------------------------------|--------|---------|-----------|--|---|---|--|--|---|
| Transforming growth factor beta receptor type 3 | Q03167 | TGFBR3  | Prevalent |  |   |   |  |  |   |
| Trypsin-1                                       | P07477 | PRSS1   | Prevalent |  | Y | Y |  |  | Y |
| Tumor necrosis factor-inducible gene 6 protein  | P98066 | TNFAIP6 | Prevalent |  |   | Y |  |  | Y |
| Wnt inhibitory factor 1                         | Q9Y5W5 | WIF1    | Prevalent |  |   |   |  |  |   |

Table S5: Results of the data analytics of replicated proteins:  
(Excel sheet)

Table S6: Comparison between original model and drug-adjusted model with replicated prevalent type 2 diabetes proteins showing those that lost significance or showed different direction of effect estimate in any of the drug-adjusted models:

| Drug (number of participants taking the drug)    | C2                 |          | PYY                |          | CATZ               |          | N   |
|--------------------------------------------------|--------------------|----------|--------------------|----------|--------------------|----------|-----|
|                                                  | OR (95% CI)        | P-value  | OR (95% CI)        | P-value  | OR (95% CI)        | P-value  |     |
| <b>Original Result</b>                           | 2.01 (1.37 - 3.04) | 6.63E-04 | 1.34 (1.1 - 1.62)  | 3.36E-03 | 1.41 (1.13 - 1.77) | 2.27E-03 | 993 |
| <b>Antidiabetic Medications (52)</b>             | 1.33 (0.9 - 2.18)  | 2.21E-01 | 0.9 (0.67 - 1.19)  | 4.71E-01 | 1.15 (0.86 - 1.54) | 3.30E-01 | 993 |
| <b>Insulin (11)</b>                              | 1.93 (1.3 - 2.97)  | 1.81E-03 | 1.33 (1.08 - 1.63) | 5.26E-03 | 1.39 (1.1 - 1.75)  | 5.32E-03 | 993 |
| <b>Oral antidiabetics (49)</b>                   | 1.34 (0.91 - 2.17) | 2.02E-01 | 0.89 (0.66 - 1.17) | 3.97E-01 | 1.19 (0.89 - 1.58) | 2.31E-01 | 993 |
| <b>Oral antidiabetics without Metformin (27)</b> | 1.61 (1.08 - 2.52) | 2.78E-02 | 1.14 (0.9 - 1.42)  | 2.63E-01 | 1.25 (0.97 - 1.6)  | 8.26E-02 | 993 |
| <b>Metformin (40)</b>                            | 1.37 (0.94 - 2.17) | 1.44E-01 | 0.93 (0.71 - 1.21) | 6.07E-01 | 1.27 (0.98 - 1.66) | 7.51E-02 | 991 |

Table S7: Mendelian randomization results of the direction with type 2 diabetes as the exposure and the individual proteins as the outcome.

| <b>Protein</b>                                  | <b>IVW Beta (SE)</b> | <b>IVW p-value</b> | <b>n SNPs</b> | <b>Pleiotropy test *</b> | <b>Protein summary statistics origin</b> |
|-------------------------------------------------|----------------------|--------------------|---------------|--------------------------|------------------------------------------|
| Aminoacylase-1                                  | -0.02 (0.07)         | 7.51E-01           | 96            | 2.01E-01                 | Suhre K                                  |
| Growth hormone receptor                         | 0.02 (0.04)          | 6.86E-01           | 120           | 5.60E-01                 | Sun BB                                   |
| Insulin-like growth factor-binding protein 2    | -0.05 (0.05)         | 2.47E-01           | 120           | 6.97E-01                 | Sun BB                                   |
| Apolipoprotein B                                | -0.07 (0.04)         | 1.12E-01           | 120           | 3.24E-01                 | Sun BB                                   |
| Cerebral dopamine neurotrophic factor           | 0.02 (0.04)          | 5.54E-01           | 120           | 8.09E-01                 | Sun BB                                   |
| Plasma protease C1 inhibitor                    | -0.05 (0.04)         | 2.35E-01           | 120           | 7.84E-01                 | Sun BB                                   |
| Complement C2                                   | -0.02 (0.08)         | 8.35E-01           | 96            | 1.65E-01                 | Suhre K                                  |
| Lysosomal protective protein                    | -0.003 (0.04)        | 9.39E-01           | 120           | 6.42E-01                 | Sun BB                                   |
| Cathepsin Z                                     | 0.13 (0.04)          | 2.00E-03           | 120           | 1.80E-01                 | Sun BB                                   |
| Gelsolin                                        | 0.03 (0.08)          | 6.61E-01           | 96            | 3.21E-01                 | Suhre K                                  |
| Alpha-L-iduronidase                             | 0.02 (0.04)          | 6.82E-01           | 120           | 6.87E-01                 | Sun BB                                   |
| Kallikrein-7                                    | -0.04 (0.04)         | 2.29E-01           | 120           | 9.56E-01                 | Sun BB                                   |
| Galectin-3-binding protein                      | 0.13 (0.07)          | 8.38E-02           | 96            | 9.82E-01                 | Suhre K                                  |
| Matrilin-2                                      | 0.03 (0.04)          | 5.14E-01           | 120           | 1.24E-01                 | Sun BB                                   |
| Hepatocyte growth factor receptor               | -0.09 (0.05)         | 1.11E-01           | 120           | 4.38E-01                 | Sun BB                                   |
| Osteomodulin                                    | -0.02 (0.04)         | 5.70E-01           | 120           | 2.20E-01                 | Sun BB                                   |
| Periostin                                       | 0.01 (0.04)          | 7.98E-01           | 120           | 7.68E-01                 | Sun BB                                   |
| Peptide YY                                      | 0.05 (0.04)          | 1.70E-01           | 120           | 3.37E-01                 | Sun BB                                   |
| Renin                                           | 0.08 (0.04)          | 3.15E-02           | 120           | 1.05E-01                 | Sun BB                                   |
| RGM domain family member B                      | -0.01 (0.04)         | 8.52E-01           | 120           | 5.97E-01                 | Sun BB                                   |
| Sex hormone-binding globulin                    | -0.01 (0.08)         | 8.55E-01           | 96            | 1.89E-02                 | Suhre K                                  |
| SLIT and NTRK-like protein 5                    | 0.01 (0.04)          | 7.49E-01           | 120           | 1.43E-02                 | Sun BB                                   |
| Transforming growth factor beta receptor type 3 | -0.01 (0.04)         | 8.30E-01           | 120           | 5.10E-01                 | Sun BB                                   |
| Trypsin-1                                       | -0.01 (0.04)         | 8.08E-01           | 120           | 6.16E-01                 | Sun BB                                   |
| Tumor necrosis factor-inducible gene 6 protein  | 0.05 (0.04)          | 2.63E-01           | 120           | 5.41E-01                 | Sun BB                                   |
| Wnt inhibitory factor 1                         | 0.04 (0.04)          | 2.98E-01           | 120           | 1.72E-01                 | Sun BB                                   |

\* Pleiotropy p value represents the p value of the intercept of Egger's regression.

Table S8: Mendelian randomization results of the direction with the proteins as the exposure and type 2 diabetes as the outcome. All causal effects were tested using Wald statistics.

| Protein                                        | Beta  | SE   | p value  | SNP (IV)       | IV Origin  |
|------------------------------------------------|-------|------|----------|----------------|------------|
| Alpha-L-iduronidase                            | 0.03  | 0.05 | 4.93E-01 | rs7665097<br>2 | Sun BB     |
| Apolipoprotein B                               | 0.05  | 0.03 | 1.16E-01 | rs679899       | Emilsson V |
| Cerebral dopamine neurotrophic factor          | 0.00  | 0.05 | 9.75E-01 | rs1181433<br>7 | Sun BB     |
| Growth hormone receptor                        | -0.03 | 0.05 | 5.35E-01 | rs3474200<br>8 | Sun BB     |
| Hepatocyte growth factor receptor              | -0.01 | 0.05 | 8.07E-01 | rs437          | Sun BB     |
| Kallikrein-7                                   | 0.01  | 0.05 | 7.74E-01 | rs2691258      | Sun BB     |
| Matrilin-2                                     | -0.06 | 0.05 | 2.77E-01 | rs1783116<br>0 | Sun BB     |
| Peptide YY                                     | 0.03  | 0.05 | 5.84E-01 | rs8074783      | Emilsson V |
| Periostin                                      | -0.04 | 0.03 | 1.91E-01 | rs962462       | Emilsson V |
| Plasma protease C1 inhibitor                   | 0.00  | 0.01 | 7.62E-01 | rs1122907<br>5 | Sun BB     |
| RGM domain family member B                     | 0.02  | 0.04 | 5.65E-01 | rs1563317      | Sun BB     |
| Sex hormone-binding globulin                   | -0.09 | 0.04 | 2.95E-02 | rs858519       | Emilsson V |
| Tumor necrosis factor-inducible gene 6 protein | -0.03 | 0.01 | 5.41E-02 | rs289828       | Sun BB     |

Table S9: Information on replicated proteins' validation adapted from Emilsson V. et al.:

| Target Full Name                                | UniProt | Gene Symbol | DDA      | MRM  | Cis effect | Cis-Trans effects | Protein module |
|-------------------------------------------------|---------|-------------|----------|------|------------|-------------------|----------------|
| Matrilin-2                                      | O00339  | MATN2       | MATN2    |      |            |                   | PM26           |
| SLIT and NTRK-like protein 5                    | O94991  | SLITRK5     |          |      | SLITRK5    |                   | PM26           |
| Renin                                           | P00797  | REN         | REN      | REN  |            |                   | No module      |
| Apolipoprotein B                                | P04114  | APOB        | APOB     | APOB | APOB       | APOB              | PM11           |
| Sex hormone-binding globulin                    | P04278  | SHBG        | SHBG     |      | SHBG       | SHBG              | No module      |
| Plasma protease C1 inhibitor                    | P05155  | SERPING1    | SERPING1 |      | SERPING1   | SERPING1          | PM27           |
| Gelsolin                                        | P06396  | GSN         | GSN      |      | GSN        |                   | PM27           |
| Complement C2                                   | P06681  | C2          | C2       |      | C2         | C2                | No module      |
| Trypsin-1                                       | P07477  | PRSS1       |          |      |            |                   | No module      |
| Hepatocyte growth factor receptor               | P08581  | MET         |          | MET  | MET        | MET               | PM27           |
| Peptide YY                                      | P10082  | PYY         |          |      | PYY        |                   | PM26           |
| Lysosomal protective protein                    | P10619  | CTSA        | CTSA     |      |            | CTSA              | No module      |
| Growth hormone receptor                         | P10912  | GHR         |          |      | GHR        |                   | No module      |
| Insulin-like growth factor-binding protein 2    | P18065  | IGFBP2      | IGFBP2   |      |            |                   | PM10           |
| Alpha-L-iduronidase                             | P35475  | IDUA        |          | IDUA | IDUA       |                   | No module      |
| Kallikrein-7                                    | P49862  | KLK7        | KLK7     |      | KLK7       |                   | PM27           |
| Tumor necrosis factor-inducible gene 6 protein  | P98066  | TNFAIP6     |          |      | TNFAIP6    |                   | PM27           |
| Aminoacylase-1                                  | Q03154  | ACY1        | ACY1     | ACY1 |            |                   | PM23           |
| Transforming growth factor beta receptor type 3 | Q03167  | TGFB3       |          |      |            |                   | PM26           |
| Galectin-3-binding protein                      | Q08380  | LGALS3BP    |          |      | LGALS3BP   |                   | PM6            |
| Periostin                                       | Q15063  | POSTN       |          |      | POSTN      |                   | PM13           |
| Cerebral dopamine neurotrophic factor           | Q49AH0  | CDNF        |          |      | CDNF       |                   | PM2            |
| RGM domain family member B                      | Q6NW40  | RGMB        |          |      |            |                   | PM26           |
| Osteomodulin                                    | Q99983  | OMD         |          |      |            |                   | PM27           |
| Cathepsin Z                                     | Q9UBR2  | CTSZ        |          |      | CTSZ       |                   | PM26           |
| Wnt inhibitory factor 1                         | Q9Y5W5  | WIF1        |          |      |            | WIF1              | PM13           |

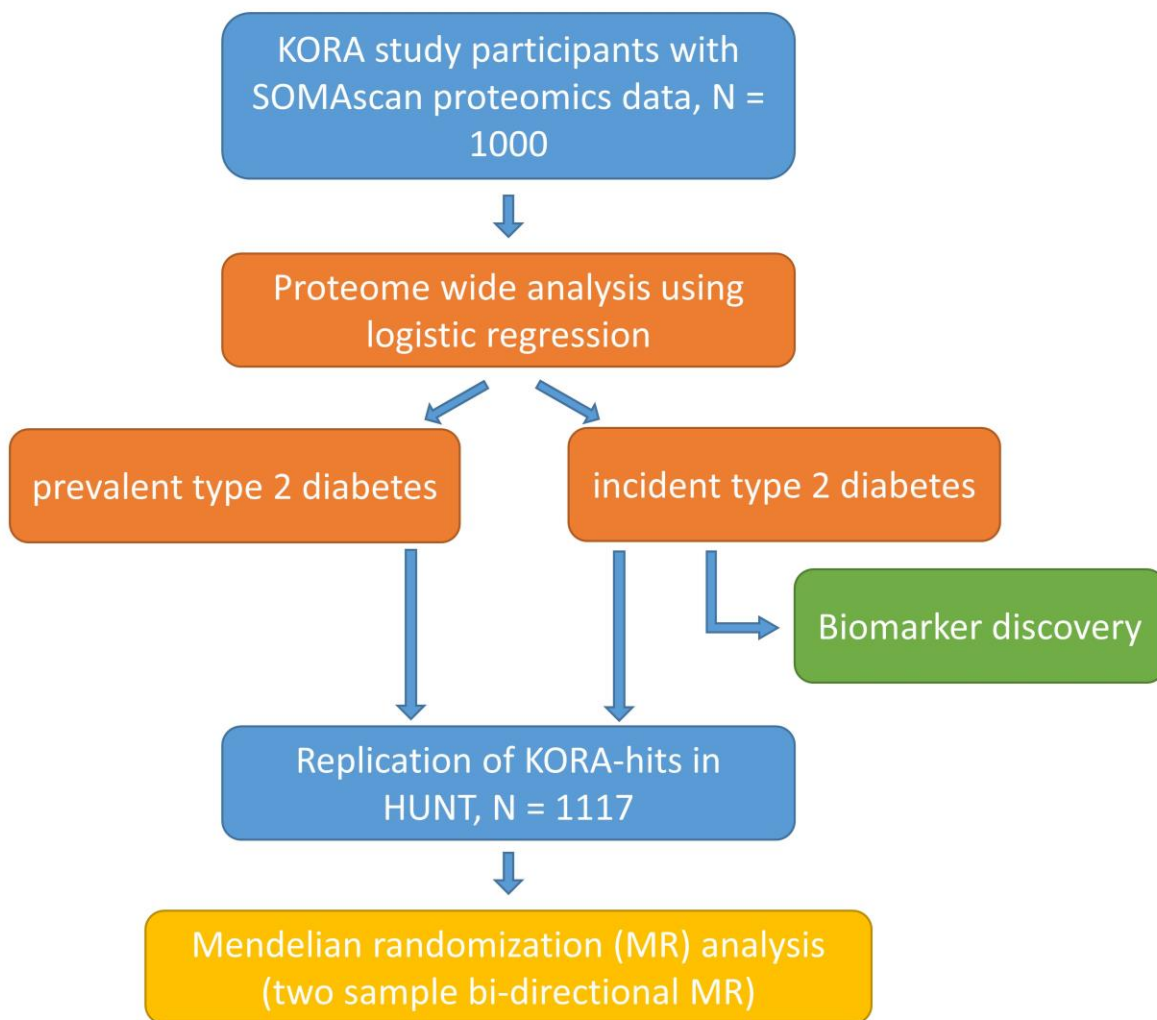

Figure S1: Analysis flowchart.



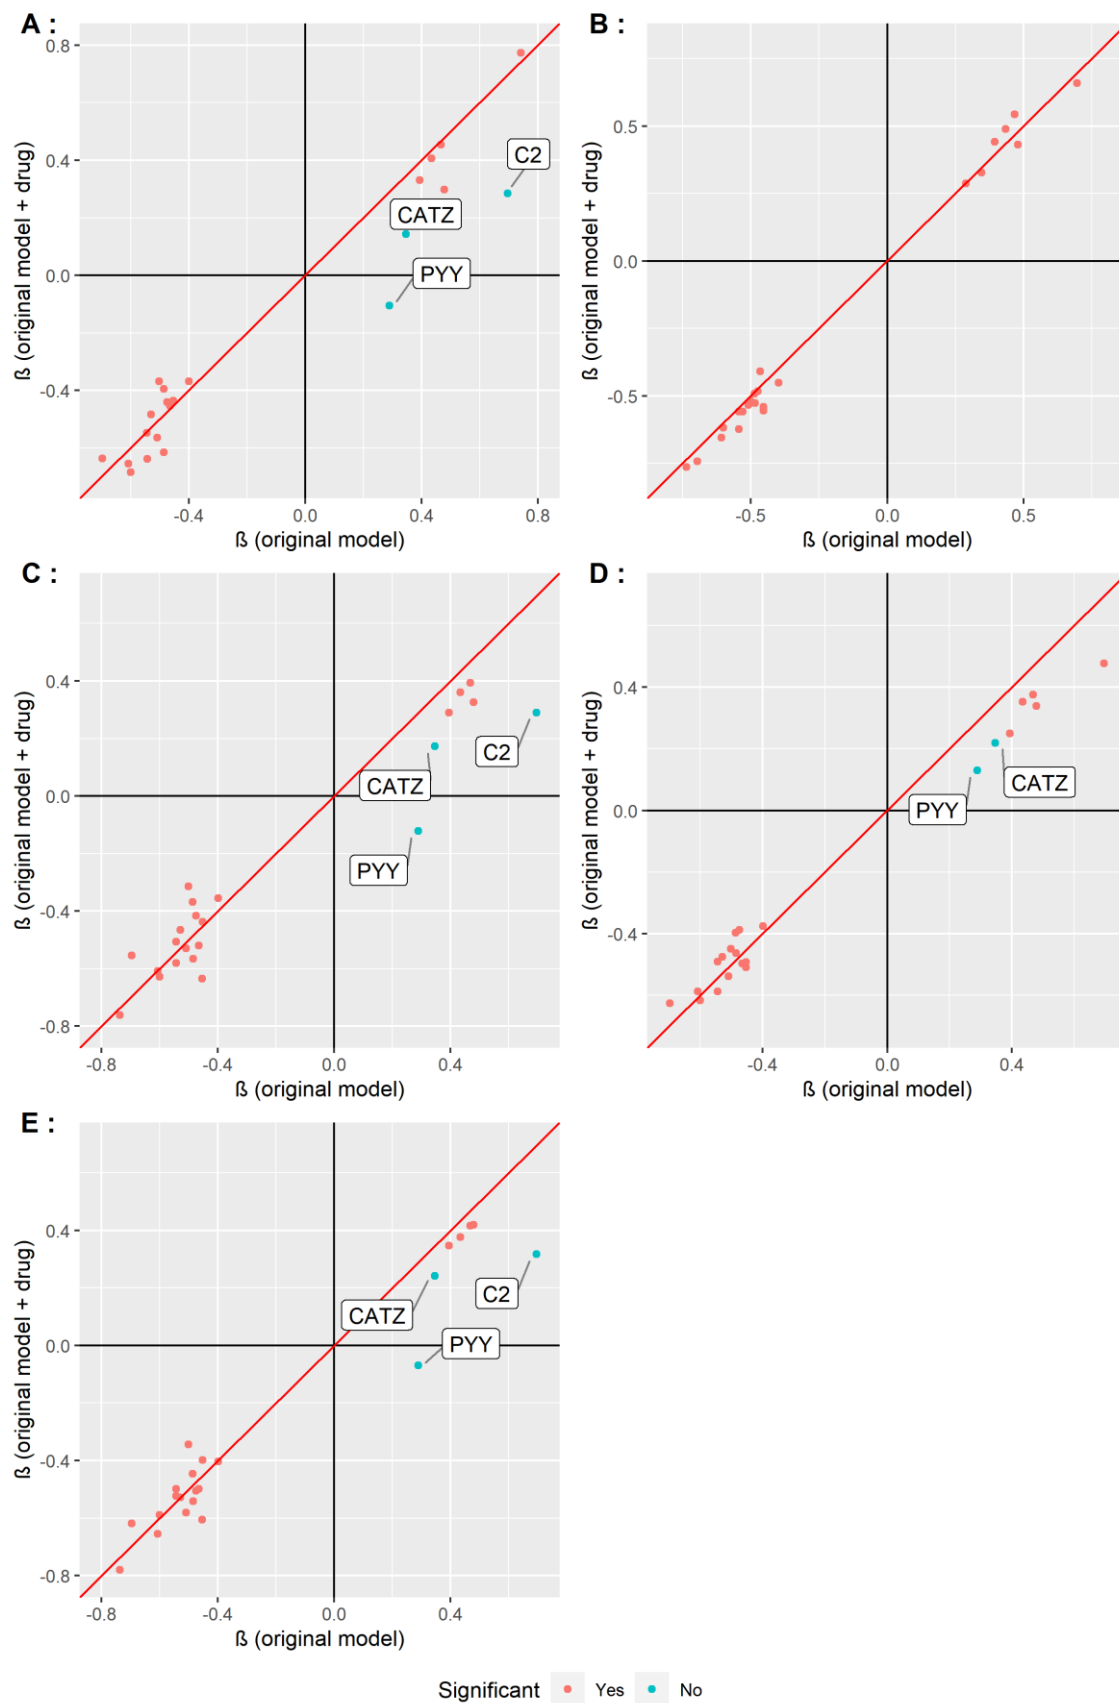

Figure S2: Results of drug-adjusted model of replicated prevalent type 2 diabetes associations. (A: Antidiabetic Medications, B: Insulin, C: Oral antidiabetics, D: Oral antidiabetics without Metformin, E: Metformin).

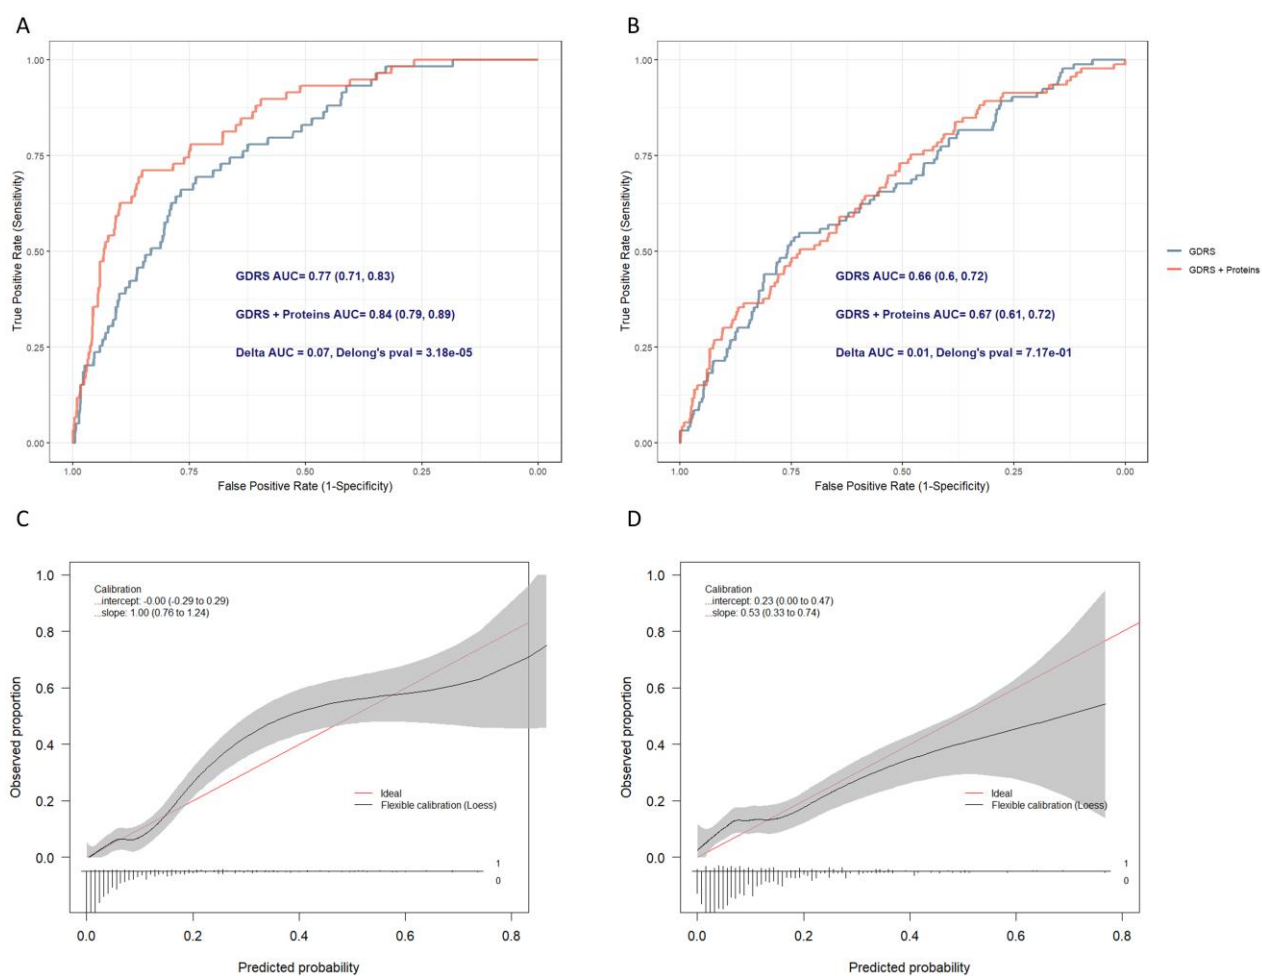

Figure S3: Performance of LASSO selected biomarkers on top of GDRS compared to GDRS in KORA and HUNT: assessing discrimination using receiver operating characteristic curve and c-statistic (A: KORA, B: HUNT), and assessing calibration (C: KORA, D: HUNT).

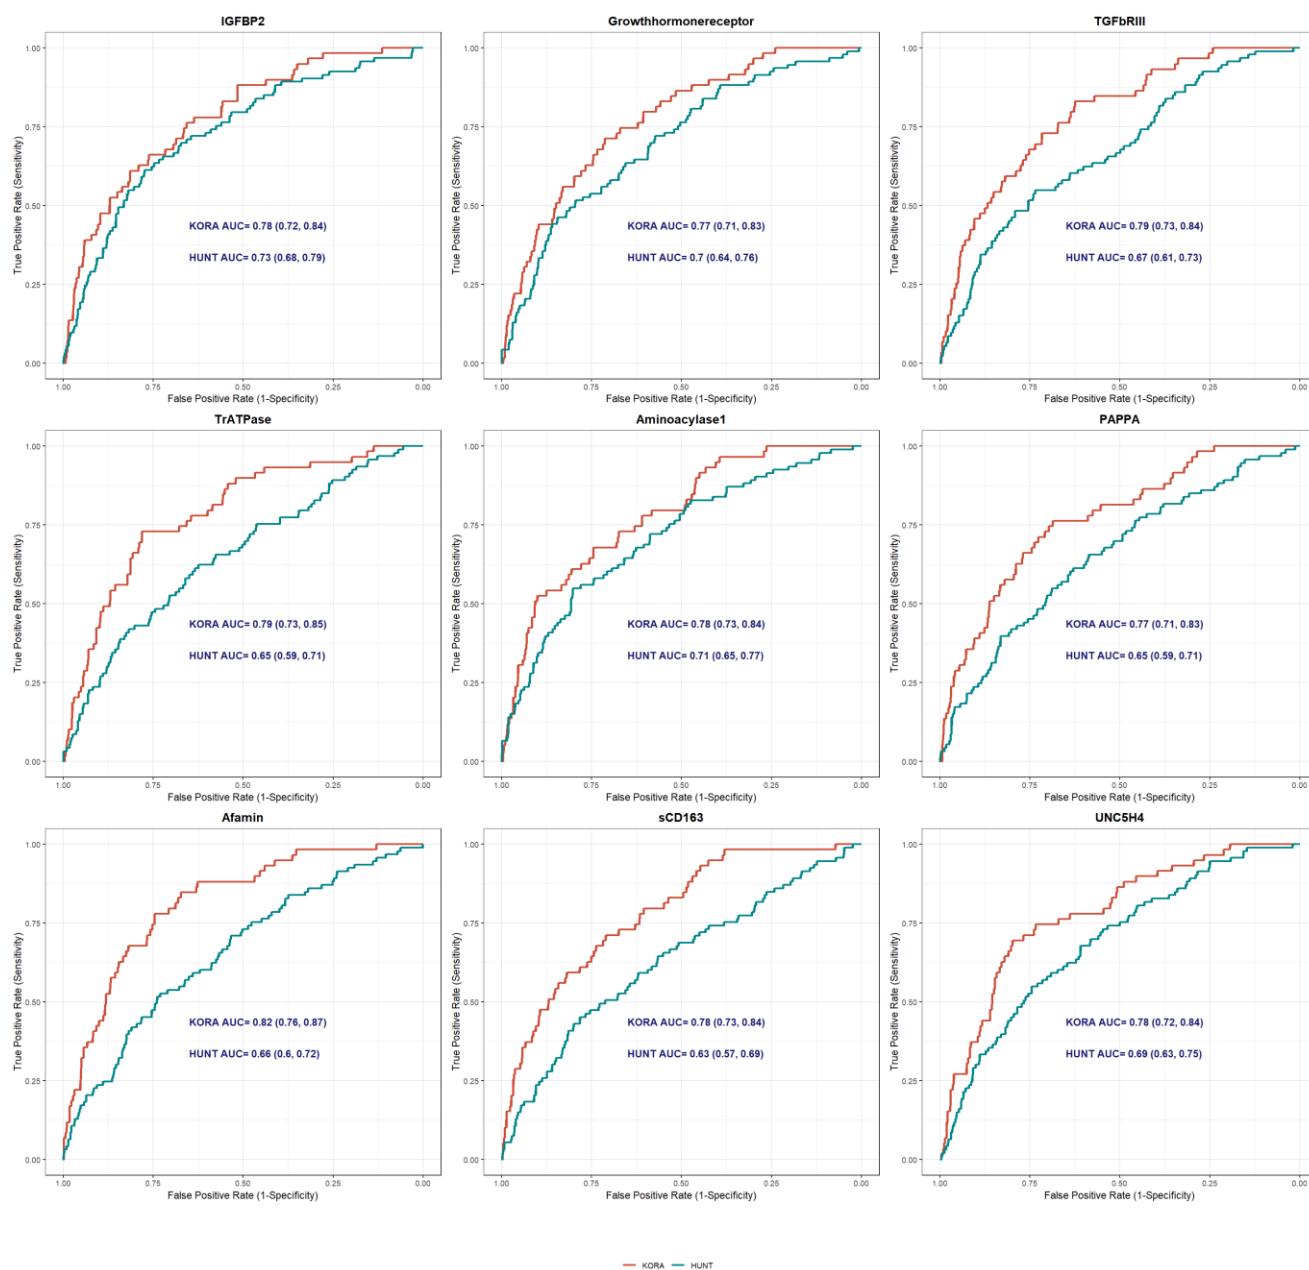

Figure S4: Performance of individual proteins on top of GDRS in both KORA and HUNT.

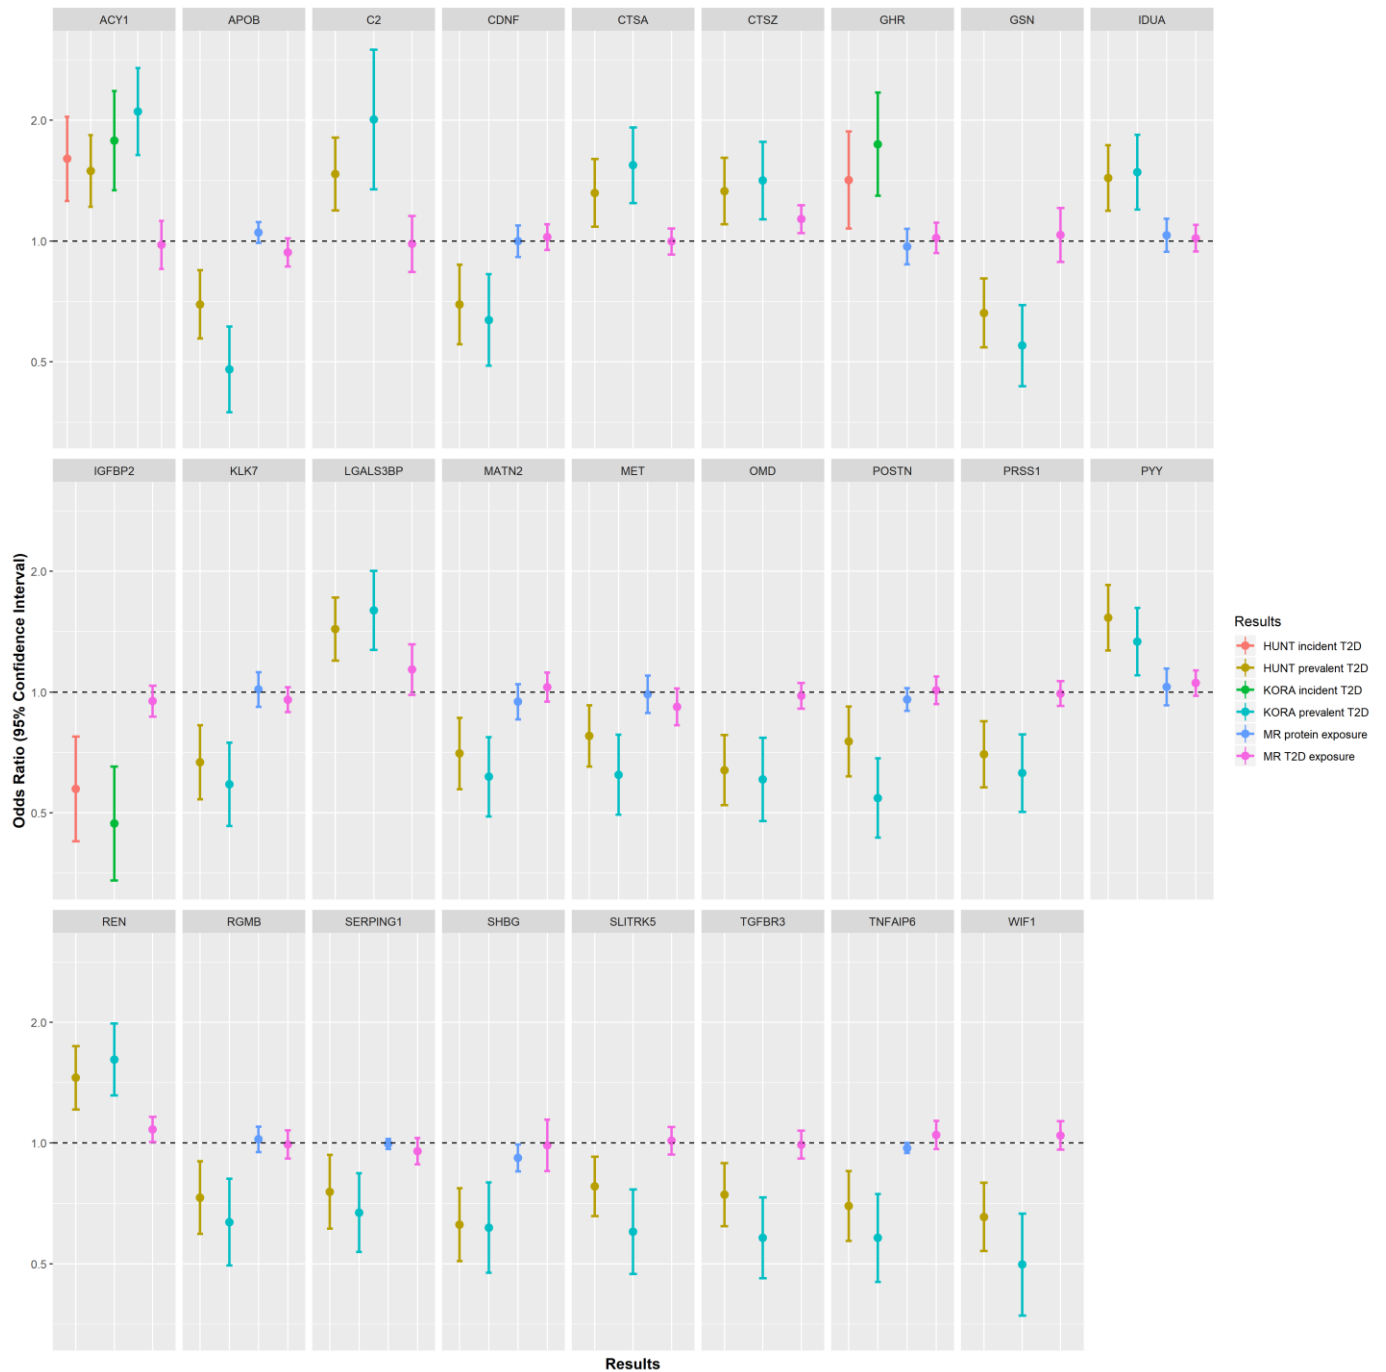

Figure S5: Forest plot of proteome wide analysis in KORA and HUNT as well as Mendelian randomization results for replicated proteins. Odds ratio are per SD change of protein level.

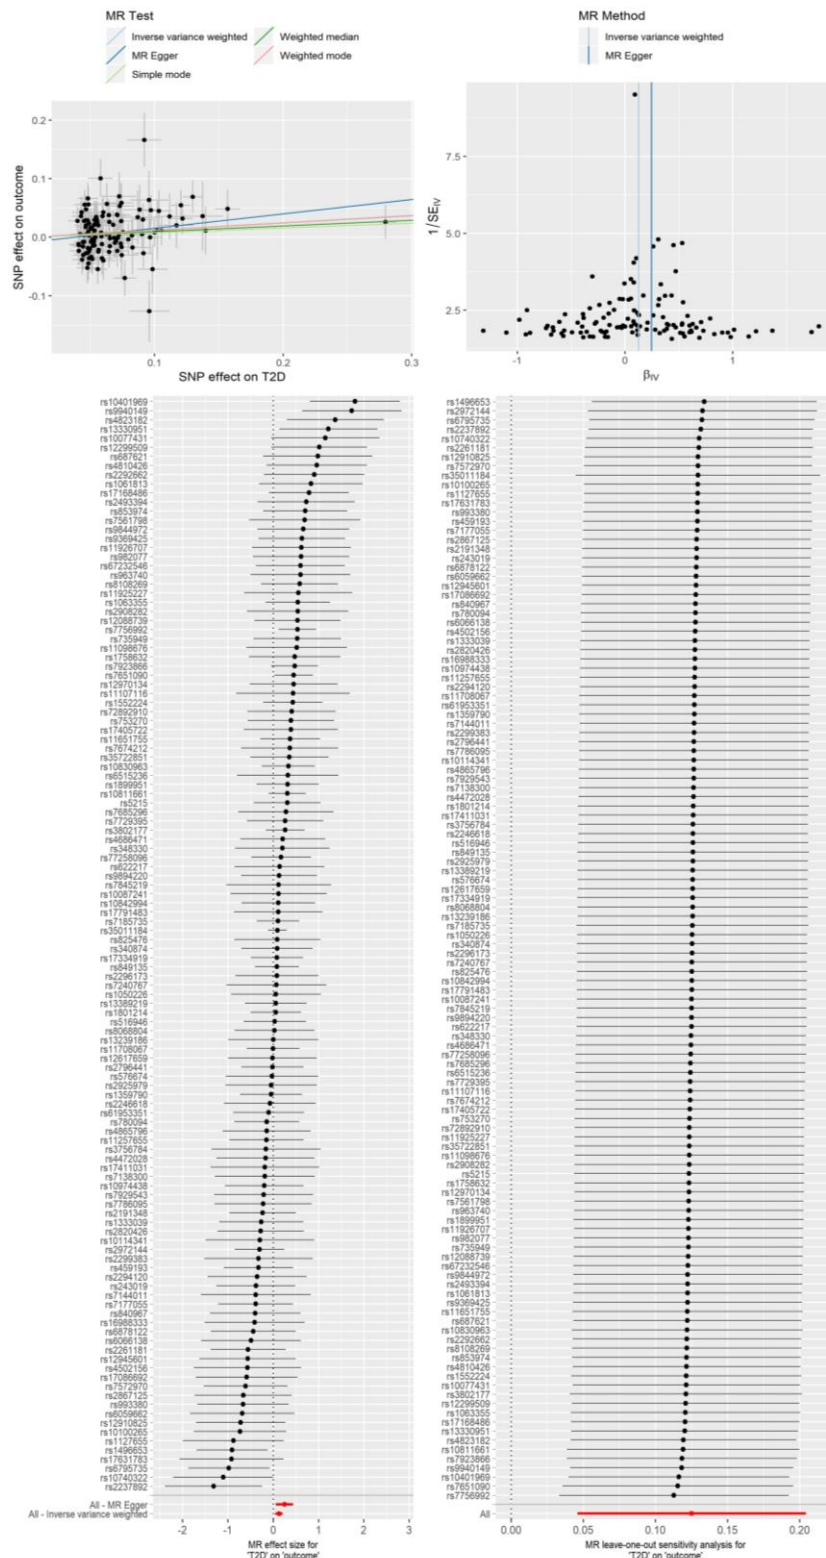

Figure S6: Sensitivity analyses of the Mendelian randomization analysis with cathepsin Z as the outcome. From top left to right: a: Scatter plot of the IVs' effects on exposure and outcome with causal analysis fitted lines plotted to check if there are any outliers driving the results; b: Funnel plot of the IVs' effects on the exposure to check for pleiotropy; c: Forest plot of the casual effect of each SNP to check for any potential outliers driving the results; d: Leave-one-out analysis to check if the results are dependent on any specific IV.

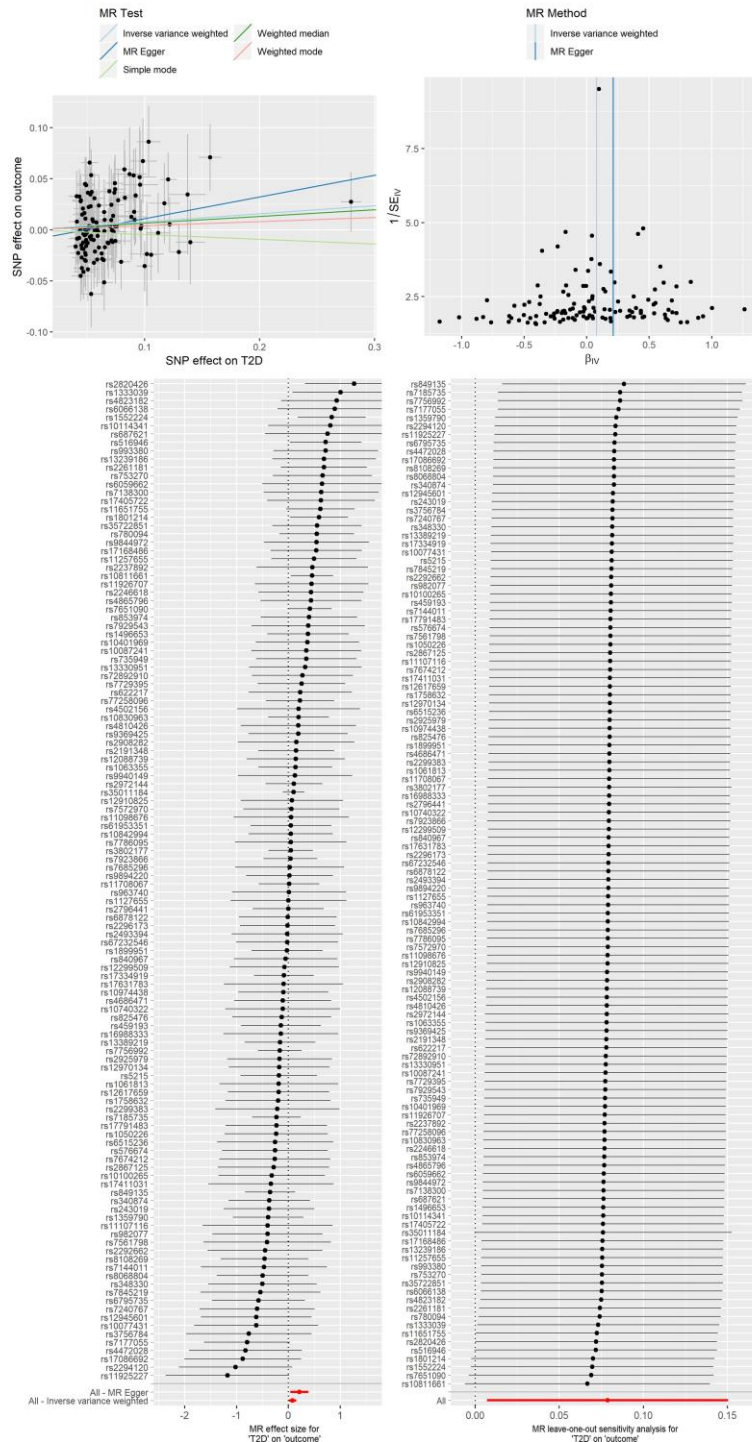

Figure S7: Sensitivity analyses of the Mendelian randomization analysis with renin as the outcome. From top left to right: a: Scatter plot of the IVs' effects on exposure and outcome with causal analysis fitted lines plotted to check if there are any outliers driving the results; b: Funnel plot of the IVs' effects on the exposure to check for pleiotropy; c: Forest plot of the casual effect of each SNP to check for any potential outliers driving the results; d: Leave-one-out analysis to check if the results are dependent on any specific IV.

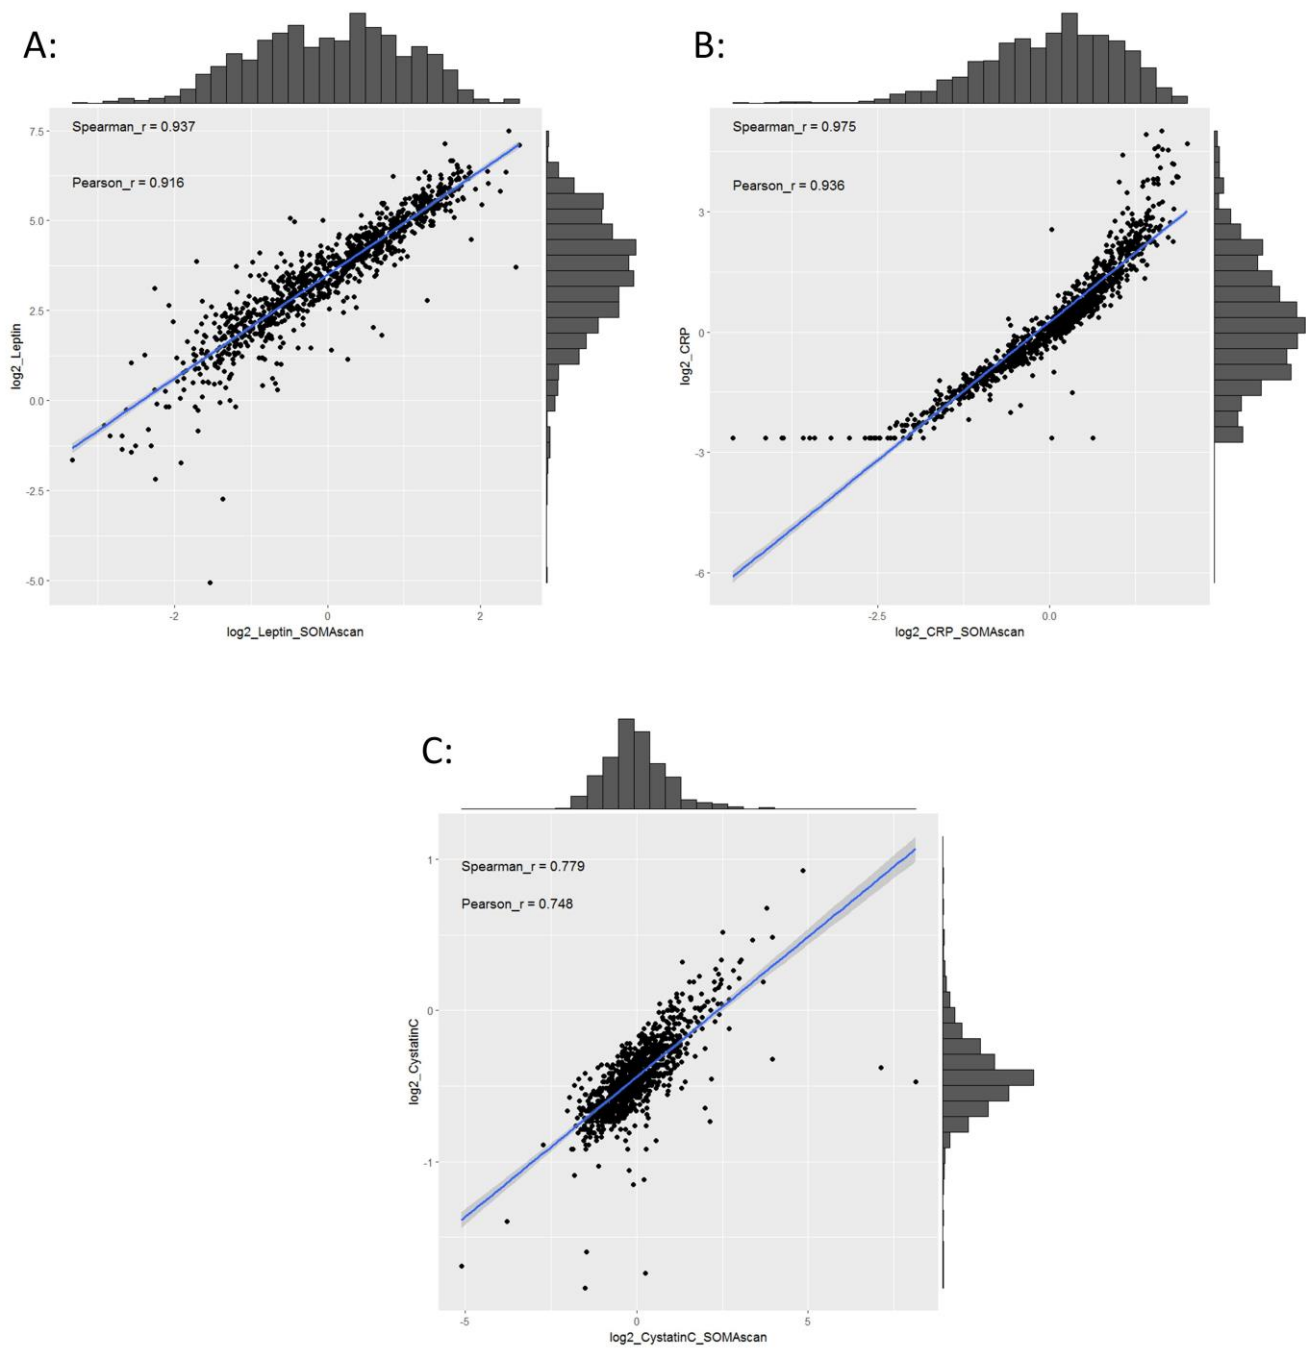

Figure S8: Correlation between SOMAscan measured and otherwise measured biomarkers in KORA (A: leptin by ELISA; B: CRP by nephelometry; C: cystatin-C by nephelometry).

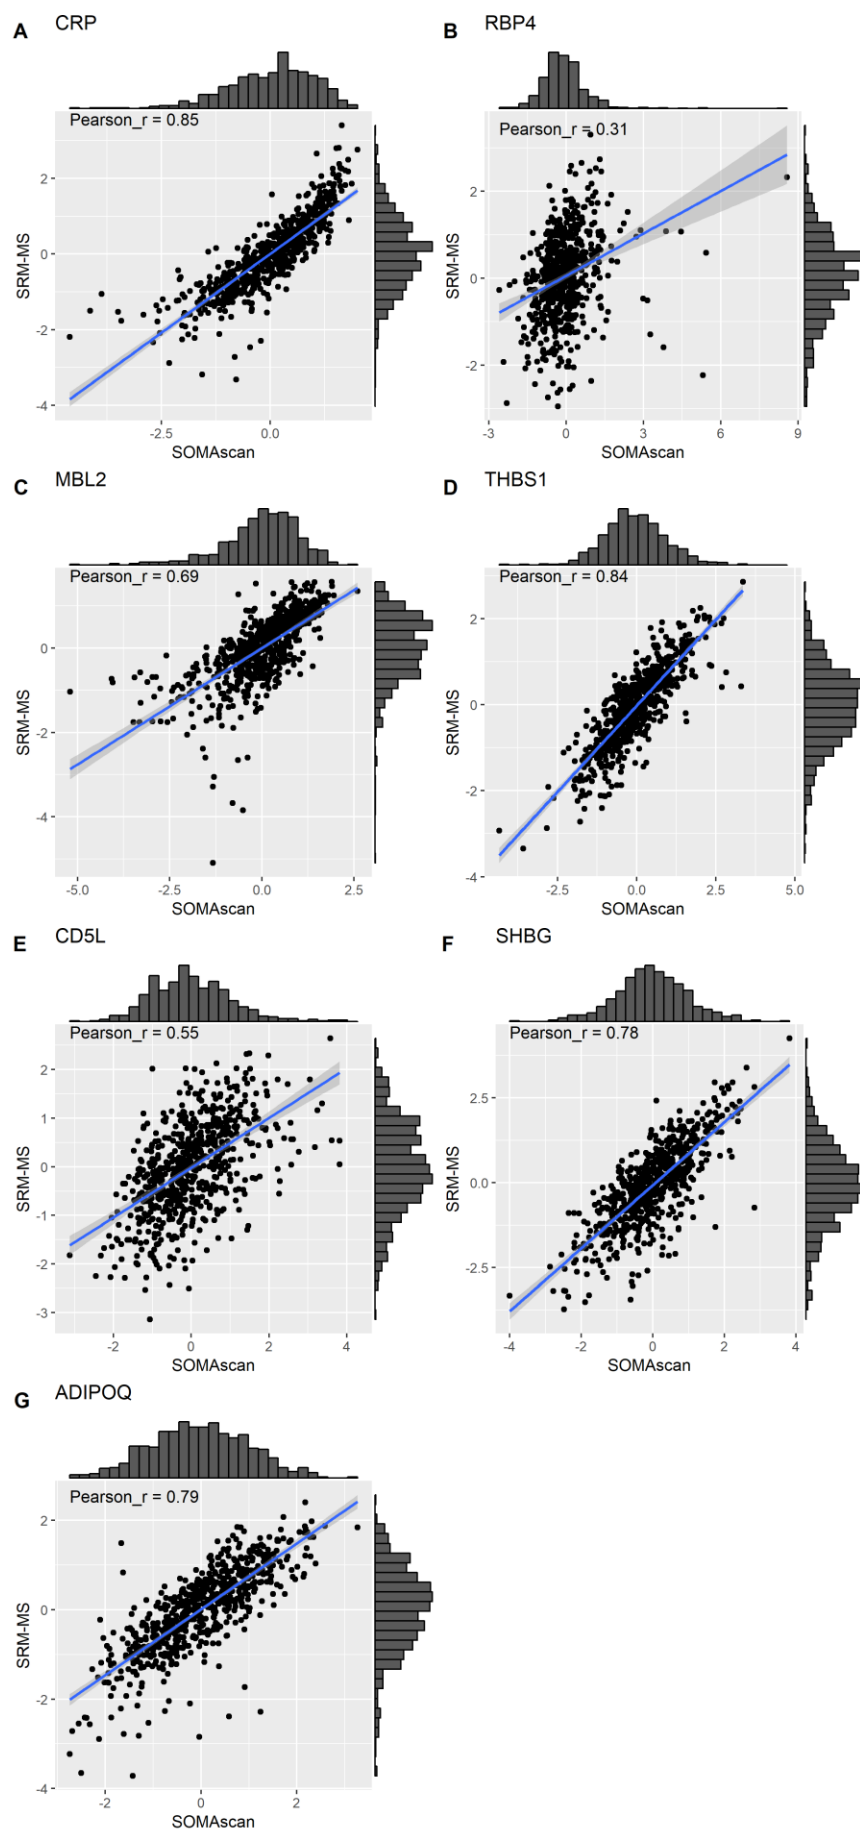

Figure S9: Correlation between SOMAscan measured and SRM-MS measured biomarkers in KORA



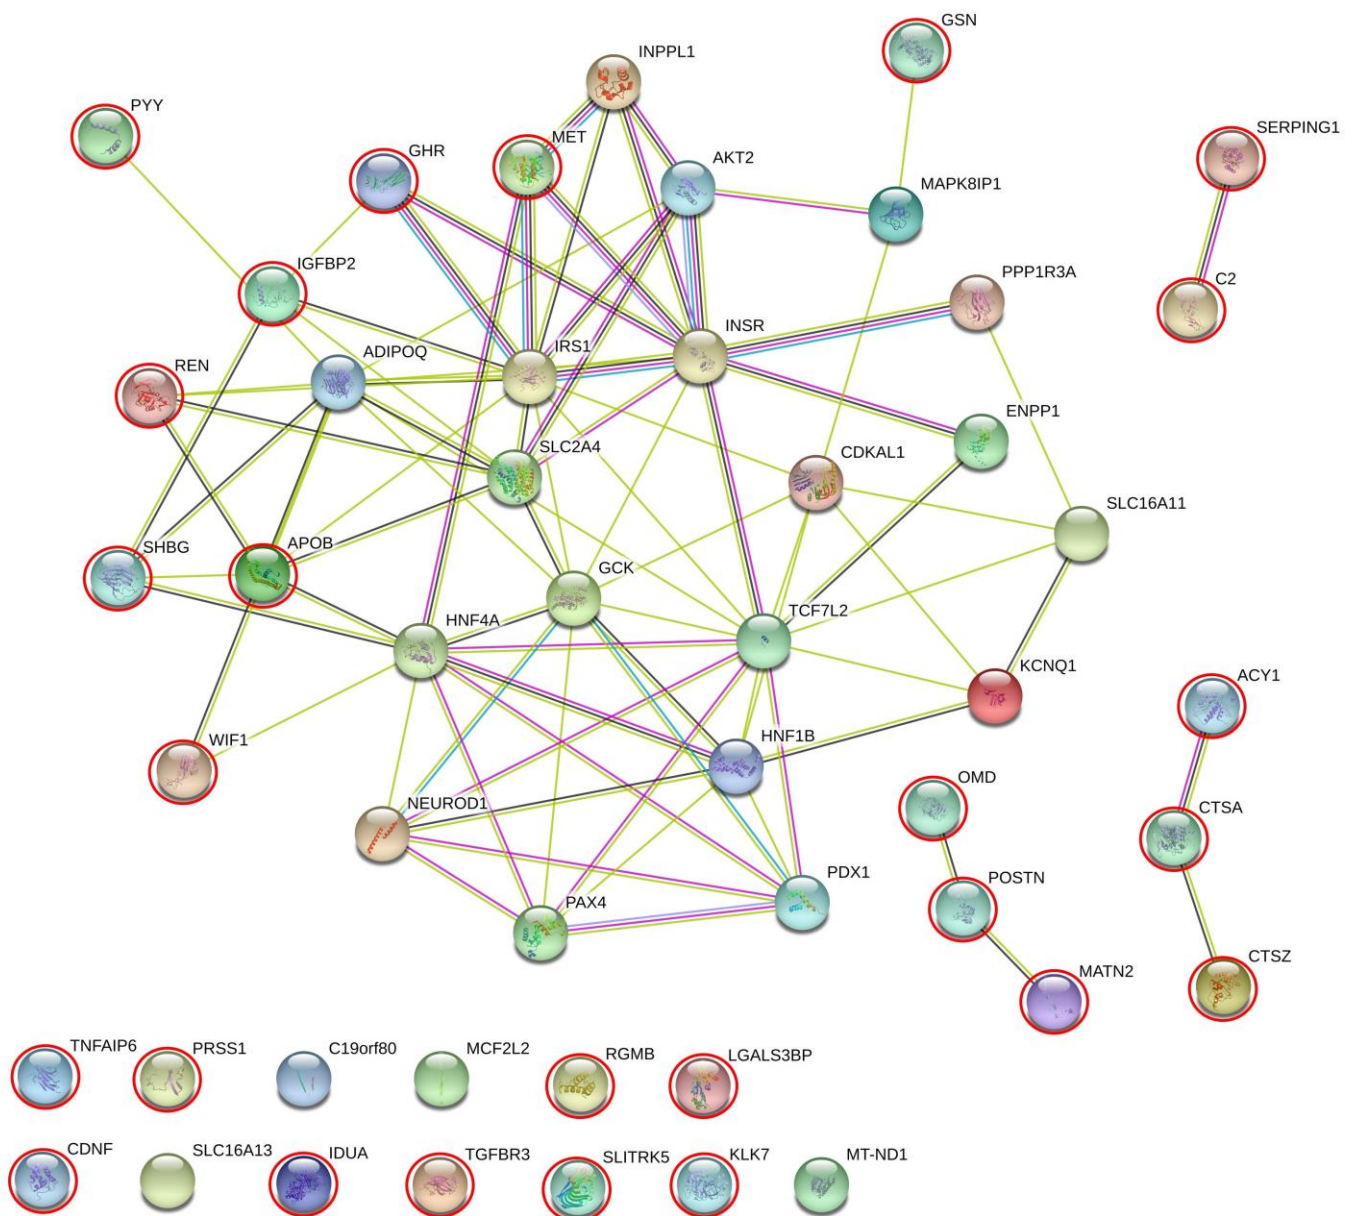

Figure S10: Network analysis using STRING featuring our replicated proteins, which are marked by red circles, and UniProt reported proteins associated with type 2 diabetes (<https://version-11-0.string-db.org/cgi/network.pl?networkId=OzpbBXbgS2PW>). Of the UniProt curated proteins, only two proteins were measured by SOMAscan. Adiponectin was significant in KORA but failed quality control in HUNT and could not be replicated and insulin receptor was not significant in our results.

# References

1. Mühlenbruch K, Joost H-G, Boeing H, Schulze M. Risk prediction for type 2 diabetes in the German population with the updated German Diabetes Risk Score (GDRS). *Ernährungs Umschau* 2014;61:90-93
2. Paprott R, Mühlenbruch K, Mensink GBM, Thiele S, Schulze MB, Scheidt-Nave C, Heidemann C. Validation of the German Diabetes Risk Score among the general adult population: findings from the German Health Interview and Examination Surveys. *BMJ Open Diabetes Research & Care* 2016;4:e000280
3. Perna L, Mielck A, Lacruz ME, Emeny RT, von Eisenhart Rothe A, Meisinger C, Ladwig K-H. The association between resilience and diabetic neuropathy by socioeconomic position: Cross-sectional findings from the KORA-Age study. *Journal of Health Psychology* 2013;20:1222-1228
4. Emilsson V, Ilkov M, Lamb JR, Finkel N, Gudmundsson EF, Pitts R, Hoover H, Gudmundsdottir V, Horman SR, Aspelund T, Shu L, Trifonov V, Sigurdsson S, Manolescu A, Zhu J, Olafsson O, Jakobsdottir J, Lesley SA, To J, Zhang J, Harris TB, Launer LJ, Zhang B, Eiríksdóttir G, Yang X, Orth AP, Jennings LL, Gudnason V. Co-regulatory networks of human serum proteins link genetics to disease. *Science (New York, NY)* 2018;361:769-773
5. Szklarczyk D, Gable AL, Lyon D, Junge A, Wyder S, Huerta-Cepas J, Simonovic M, Doncheva NT, Morris JH, Bork P, Jensen LJ, Mering CV. STRING v11: protein-protein association networks with increased coverage, supporting functional discovery in genome-wide experimental datasets. *Nucleic acids research* 2019;47:D607-d613
6. Consortium TU. UniProt: a worldwide hub of protein knowledge. *Nucleic acids research* 2019;47:D506-D515
